# Supplementary material
Source: PubMed Central journal article supplement (PMC8118875)
Supplement: 0699.pdf [file 0699.pdf]

**On-line Table 1: Brain regional volumes (cc) in RTT and control subjects**

| Variable       | Group, Mean $\pm$ SD |                              |                              |                              |
|----------------|----------------------|------------------------------|------------------------------|------------------------------|
|                | All RTT<br>(n = 22)  | More Severe Gait<br>(n = 12) | Less Severe Gait<br>(n = 10) | Control Subjects<br>(n = 25) |
| Brain          | 885.2 $\pm$ 113.8*   | 845.0 $\pm$ 108.9            | 928.6 $\pm$ 112.5            | 1207.9 $\pm$ 95.2            |
| GM             | 536.7 $\pm$ 75.3     | 499.1 $\pm$ 75.8             | 576.9 $\pm$ 53.9*            | 758.1 $\pm$ 53.4             |
| WM             | 348.6 $\pm$ 70.2     | 345.9 $\pm$ 79.6             | 351.8 $\pm$ 65.4             | 449.8 $\pm$ 55.1             |
| Cerebrum       | 755.1 $\pm$ 106.1    | 714.7 $\pm$ 99.8             | 799.7 $\pm$ 103.9            | 1043.9 $\pm$ 83.1            |
| GM             | 450.3 $\pm$ 67.5*    | 416.4 $\pm$ 66.4             | 486.8 $\pm$ 50.3*            | 640.2 $\pm$ 48.1             |
| WM             | 304.8 $\pm$ 58.4*    | 298.2 $\pm$ 62.1             | 312.9 $\pm$ 59.0             | 403.8 $\pm$ 50.7             |
| Cortex         | 696.2 $\pm$ 98.9     | 659.0 $\pm$ 92.2             | 737.8 $\pm$ 98.4             | 964.2 $\pm$ 78.7             |
| GM             | 419.4 $\pm$ 63.3     | 387.5 $\pm$ 61.7             | 454.0 $\pm$ 48.2*            | 599.1 $\pm$ 45.5             |
| WM             | 276.8 $\pm$ 54.9*    | 271.4 $\pm$ 59.0             | 283.8 $\pm$ 55.0             | 365.2 $\pm$ 46.3             |
| Frontal lobe   | 277.7 $\pm$ 45.6     | 255.0 $\pm$ 40.0             | 303.3 $\pm$ 40.9*            | 380.1 $\pm$ 34.2             |
| GM             | 162.8 $\pm$ 28.2     | 149.1 $\pm$ 28.2             | 178.4 $\pm$ 21.0*            | 228.4 $\pm$ 22.0             |
| WM             | 115.0 $\pm$ 22.0     | 105.9 $\pm$ 17.5             | 124.9 $\pm$ 34.0             | 1515.7 $\pm$ 18.7            |
| Parietal lobe  | 194.2 $\pm$ 28.9     | 187.2 $\pm$ 28.1             | 203.2 $\pm$ 30.2             | 276.5 $\pm$ 25.0             |
| GM             | 108.4 $\pm$ 16.9*    | 101.4 $\pm$ 16.8             | 116.2 $\pm$ 14.5*            | 160.4 $\pm$ 13.5             |
| WM             | 85.8 $\pm$ 17.0      | 85.7 $\pm$ 17.2              | 87.0 $\pm$ 18.0              | 116.2 $\pm$ 15.3             |
| Temporal lobe  | 138.2 $\pm$ 20.4     | 131.2 $\pm$ 19.7             | 145.1 $\pm$ 20.0             | 188.9 $\pm$ 16.9             |
| GM             | 94.6 $\pm$ 15.4      | 86.2 $\pm$ 14.4              | 103.4 $\pm$ 11.5†            | 134.8 $\pm$ 11.1             |
| WM             | 43.6 $\pm$ 16.1‡     | 44.9 $\pm$ 21.0              | 41.7 $\pm$ 9.4               | 54.1 $\pm$ 9.7               |
| Occipital lobe | 86.0 $\pm$ 14.1      | 85.6 $\pm$ 15.1              | 86.1 $\pm$ 14.3              | 118.7 $\pm$ 12.4             |
| GM             | 53.6 $\pm$ 8.0       | 50.7 $\pm$ 7.3               | 56.0 $\pm$ 7.8               | 75.5 $\pm$ 7.2               |
| WM             | 32.4 $\pm$ 9.9       | 34.9 $\pm$ 11.6              | 30.1 $\pm$ 7.5               | 43.2 $\pm$ 7.1               |
| Brain stem     | 32.9 $\pm$ 4.2       | 32.2 $\pm$ 4.8               | 33.9 $\pm$ 3.5               | 42.0 $\pm$ 6.0               |
| GM             | 16.8 $\pm$ 2.6       | 15.8 $\pm$ 2.5               | 18.1 $\pm$ 2.4               | 23.4 $\pm$ 4.0               |
| WM             | 16.1 $\pm$ 3.3       | 16.4 $\pm$ 3.8               | 15.8 $\pm$ 2.8               | 18.6 $\pm$ 4.4               |
| Cerebellum     | 97.2 $\pm$ 11.7      | 98.1 $\pm$ 12.9              | 95.1 $\pm$ 10.7              | 122.0 $\pm$ 15.5             |
| GM             | 69.5 $\pm$ 13.3      | 66.8 $\pm$ 16.7              | 72.1 $\pm$ 8.4               | 94.5 $\pm$ 13.0              |
| WM             | 27.7 $\pm$ 13.7      | 31.3 $\pm$ 17.2              | 23.0 $\pm$ 7.2               | 27.5 $\pm$ 8.5               |

**Note:**—RTT indicates Rett syndrome; GM, gray matter; WM, white matter.

\*  $P < .05$ .

†  $P < .10$  when comparing relative volumes between more severe and less severe (gait criterion) groups.

‡  $P < .10$  when comparing relative volumes between RTT and control subjects.

**On-line Table 2: Significantly different subobar regional volumes (cc) in RTT and control subjects**

| Variable                  | Group, Mean $\pm$ SD |                              |                              |                              |
|---------------------------|----------------------|------------------------------|------------------------------|------------------------------|
|                           | All RTT<br>(n = 22)  | More Severe Gait<br>(n = 12) | Less Severe Gait<br>(n = 10) | Control Subjects<br>(n = 25) |
| Subfrontal                |                      |                              |                              |                              |
| Prefrontal                | 116.1 $\pm$ 21.5     | 104.9 $\pm$ 18.1             | 127.6 $\pm$ 20.2*            | 155.5 $\pm$ 19.0             |
| GM                        | 80.6 $\pm$ 15.1      | 72.6 $\pm$ 14.5              | 89.5 $\pm$ 11.5*             | 109.5 $\pm$ 13.5             |
| WM                        | 35.4 $\pm$ 9.8       | 32.3 $\pm$ 9.3               | 38.1 $\pm$ 10.2              | 46.0 $\pm$ 8.4               |
| Subparietal               |                      |                              |                              |                              |
| Posterior dorsal parietal | 38.4 $\pm$ 7.3       | 36.2 $\pm$ 6.8               | 40.3 $\pm$ 7.5               | 58.0 $\pm$ 7.6               |
| GM                        | 27.2 $\pm$ 5.0*      | 25.8 $\pm$ 4.9               | 28.9 $\pm$ 5.0               | 41.7 $\pm$ 5.2               |
| WM                        | 10.8 $\pm$ 2.9       | 10.4 $\pm$ 2.6               | 11.4 $\pm$ 3.3               | 16.3 $\pm$ 3.7               |
| Inferior parietal lobule  | 52.9 $\pm$ 8.9       | 51.9 $\pm$ 8.6               | 54.2 $\pm$ 9.6               | 75.2 $\pm$ 8.0               |
| GM                        | 33.7 $\pm$ 6.0†      | 31.7 $\pm$ 5.8               | 36.2 $\pm$ 5.5               | 50.6 $\pm$ 5.0               |
| WM                        | 19.3 $\pm$ 6.1       | 20.2 $\pm$ 6.9               | 18.5 $\pm$ 5.0               | 24.6 $\pm$ 4.0               |
| Subtemporal               |                      |                              |                              |                              |
| Anterior STG              | 17.5 $\pm$ 4.8       | 14.8 $\pm$ 4.0               | 20.7 $\pm$ 3.5*              | 26.4 $\pm$ 3.7               |
| GM                        | 14.7 $\pm$ 3.8       | 12.3 $\pm$ 2.8               | 17.6 $\pm$ 2.7*              | 22.1 $\pm$ 3.9               |
| WM                        | 2.8 $\pm$ 1.7*       | 2.5 $\pm$ 2.1                | 3.2 $\pm$ 1.2                | 4.3 $\pm$ 1.8                |
| Ventral temporal lobe     | 12.5 $\pm$ 2.7       | 12.4 $\pm$ 2.8               | 12.5 $\pm$ 3.2               | 16.8 $\pm$ 2.9               |
| GM                        | 8.4 $\pm$ 2.1        | 8.0 $\pm$ 2.1                | 8.9 $\pm$ 2.0                | 12.2 $\pm$ 2.0               |
| WM                        | 4.1 $\pm$ 1.9*       | 4.5 $\pm$ 2.2                | 3.6 $\pm$ 1.3                | 4.8 $\pm$ 1.5                |
| Limbic lobe               | 24.9 $\pm$ 4.0       | 24.3 $\pm$ 4.0               | 25.5 $\pm$ 4.1               | 33.5 $\pm$ 3.2               |
| GM                        | 18.6 $\pm$ 2.7       | 17.7 $\pm$ 2.6               | 19.6 $\pm$ 2.7               | 25.5 $\pm$ 2.4               |
| WM                        | 6.3 $\pm$ 2.3*       | 6.6 $\pm$ 2.7                | 5.9 $\pm$ 1.7                | 8.3 $\pm$ 2.2                |

**Note:**—RTT indicates Rett syndrome; GM, gray matter; WM, white matter; STG, superior temporal gyrus.

\*  $P < .05$ .

†  $P < .10$  when comparing relative volumes between RTT and control subjects.
